# Supplementary material for: Selective, catalytic aerobic oxidation of alcohols using CuBr2 and bifunctional triazine-based ligands containing both a bipyridine and a TEMPO group
Source: Royal Society of Chemistry journal article supplement (doi:10.1039/b820554j), 2009-01-01
Supplement: b820554j.pdf [file b820554j.pdf]

## Electronic Supplementary Information to the paper:

### Selective, catalytic aerobic oxidation of alcohols using CuBr<sub>2</sub> and bifunctional triazine-based ligands containing both a bipyridine and a TEMPO group

Zhengliang Lu,<sup>a</sup> Tim Ladrak,<sup>a</sup> Olivier Roubeau,<sup>b</sup> John van der Toorn,<sup>a</sup> Simon J. Teat,<sup>c</sup> Chiara Massera,<sup>d</sup> Patrick Gamez<sup>a,\*</sup> and Jan Reedijk<sup>a,\*</sup>

#### List of Contents

|                                                                                                                                     |         |
|-------------------------------------------------------------------------------------------------------------------------------------|---------|
| <b>Table S1.</b> Oxidation of selected alcohols to corresponding aldehydes and ketones with the copper/ <b>4-bpyT</b> /base system. | S2      |
| <sup>1</sup> H/ <sup>13</sup> C and mass spectra for <b>3b</b> and <b>3c</b>                                                        | S2-S5   |
| <sup>1</sup> H/ <sup>13</sup> C and mass spectra for <b>5a</b> , <b>5b</b> and <b>5c</b>                                            | S5-S9   |
| <b>Table S2.</b> Crystal data and structure refinement for compounds <b>5a</b> and <b>5b</b>                                        | S10     |
| <b>Figure S1.</b> ORTEP view of the molecular structure of <b>5a</b>                                                                | S11     |
| <b>Figure S2.</b> ORTEP view of the molecular structure of <b>5b</b>                                                                | S11     |
| Mass spectra for <b>4-bpyT</b> , <b>5-bpyT</b> and <b>6-bpyT</b>                                                                    | S12-S13 |
| <b>Table S3.</b> Crystal data and structure refinement for compounds <b>4-bpyT</b> and <b>6-bpyT</b>                                | S14     |
| <b>Figure S3.</b> ORTEP view of the molecular structure of <b>4-bpyT</b>                                                            | S15     |
| <b>Figure S4.</b> ORTEP view of the molecular structure of <b>6-bpyT</b>                                                            | S15     |
| <b>Figure S5.</b> Mass spectrum for <b>6</b>                                                                                        | S16     |
| <b>Figure S6.</b> Mass spectrum for <b>7</b>                                                                                        | S16     |
| <b>Figure S7.</b> Mass spectrum for <b>8</b>                                                                                        | S17     |
| X-ray Crystallographic Analysis and Data Collection for <b>5a</b> , <b>5b</b> , <b>4-bpyT</b> and <b>6-bpyT</b>                     | S17-S19 |
| Visible spectroscopic studies of the Cu systems                                                                                     | S19     |

<sup>a</sup> Leiden Institute of Chemistry, Gorlaeus Laboratories, Leiden University, P. O. Box 9502, 2300 RA Leiden, The Netherlands

<sup>b</sup> Université Bordeaux 1, CNRS-CRPP, 115, avenue du Dr. Schweitzer, 33600 Pessac, France

<sup>c</sup> ALS, Berkeley Lab, 1 Cyclotron Rd, MS2-400, Berkeley, CA 94720, USA

<sup>d</sup> Dipartimento di Chimica Generale ed Inorganica, Chimica Analitica, Chimica Fisica, Università degli Studi di Parma, Viale G. Usberti 17/A, 43100 Parma, Italy

**Table S1.** Oxidation of selected alcohols to corresponding aldehydes and ketones carried out at 50 °C with the copper/**4-bpyT**/base system.

| Entry | Substrate       | Time [h] | Conversion [%] <sup>a</sup> |
|-------|-----------------|----------|-----------------------------|
| 1     | Benzyl alcohol  | 1.5      | 33                          |
|       |                 | 10       | 91                          |
|       |                 | 24       | 100                         |
| 2     | 1-Phenylethanol | 1.5      | 30                          |
|       |                 | 7        | 88                          |
|       |                 | 9        | 97                          |
| 3     | 1-Octanol       | 3        | 26                          |
|       |                 | 24       | 57                          |

**<sup>1</sup>H, <sup>13</sup>C and mass spectra for 3b**

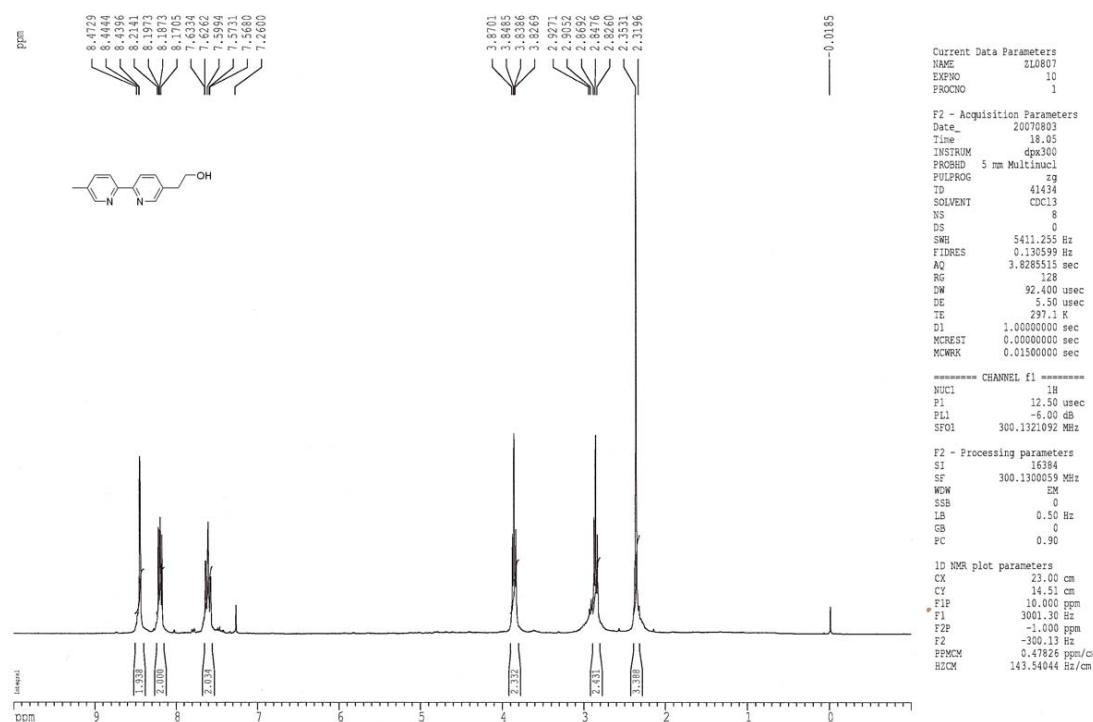

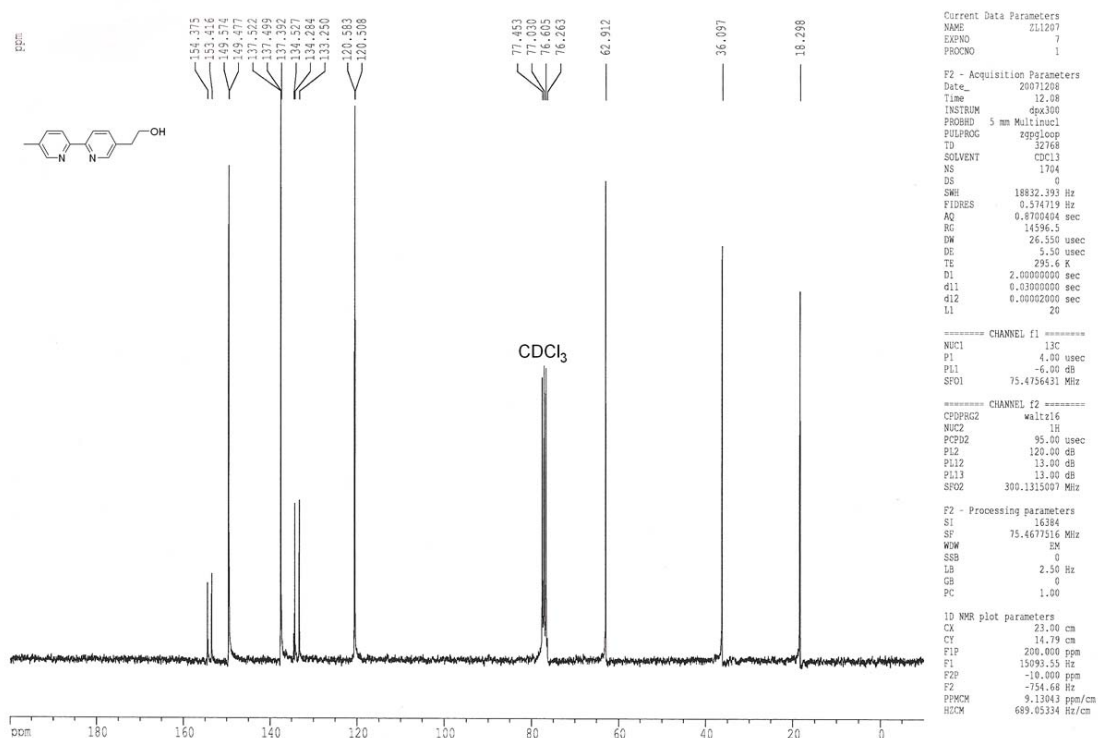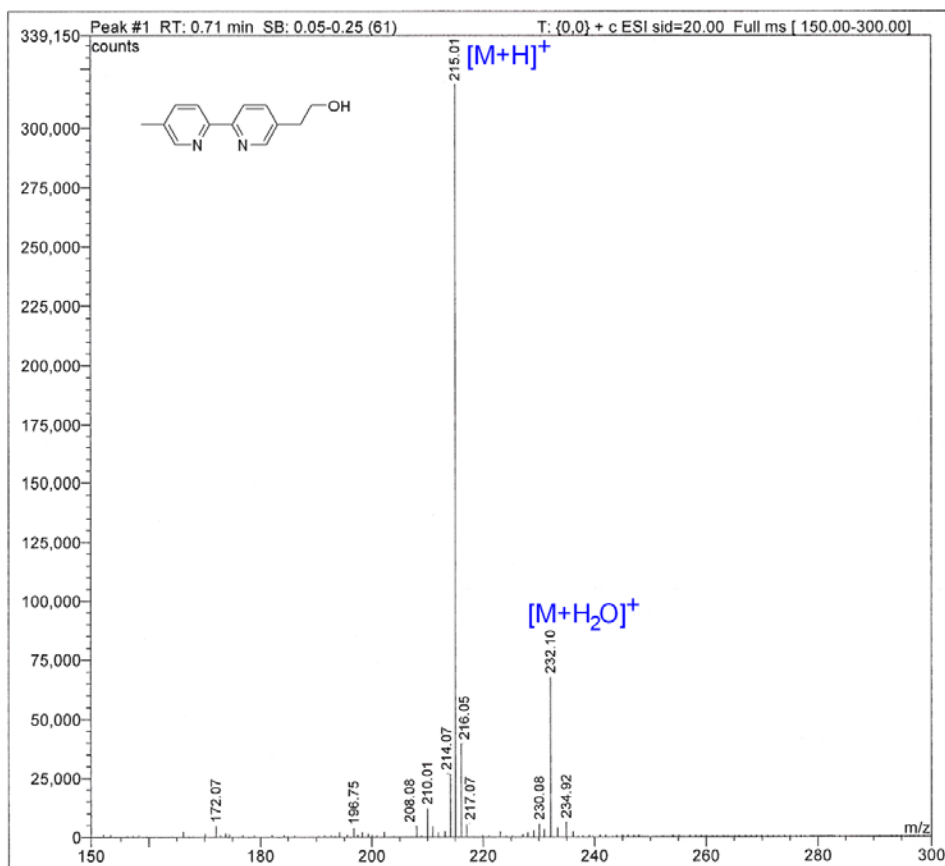

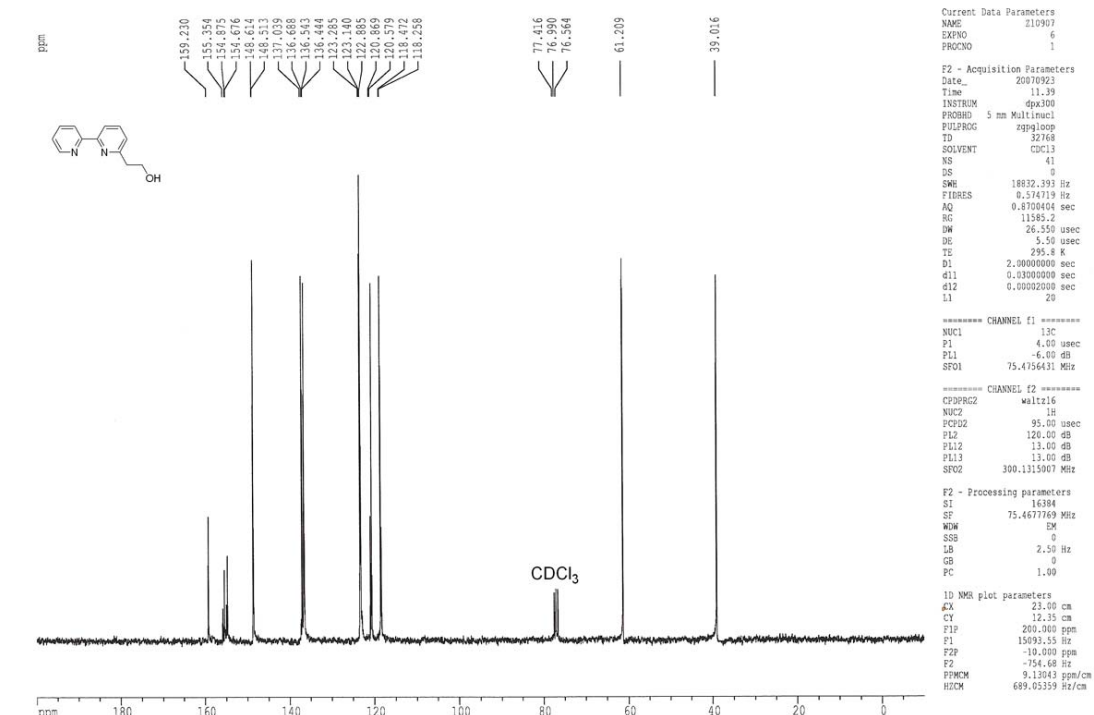



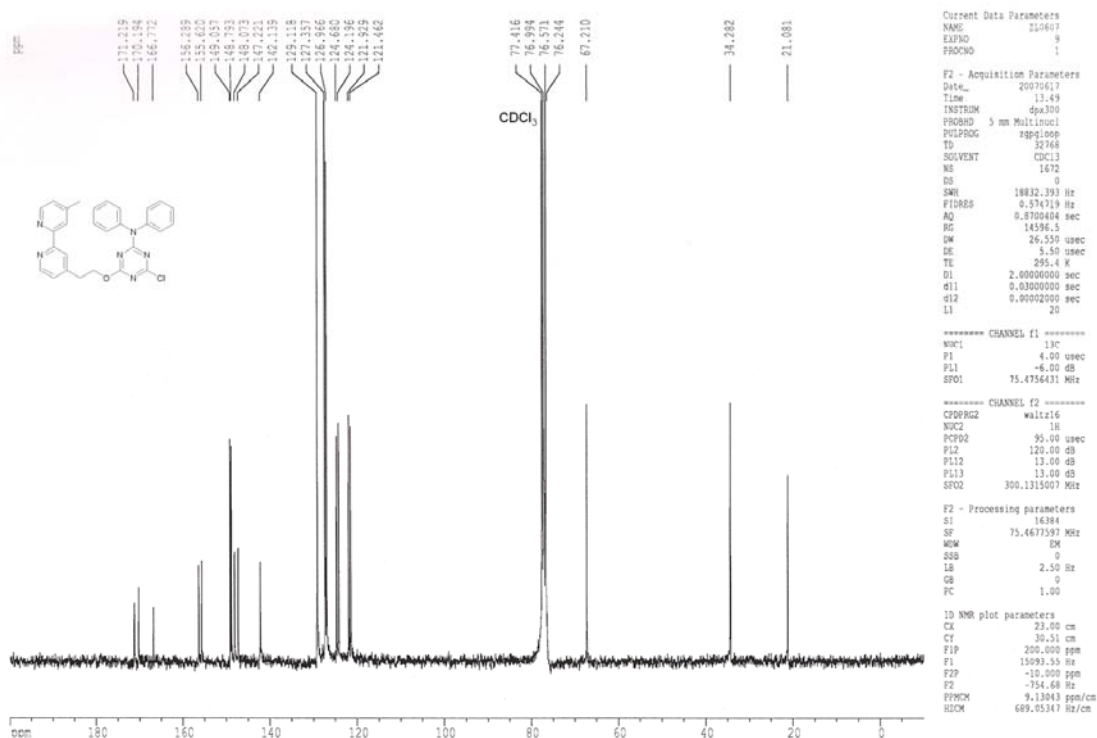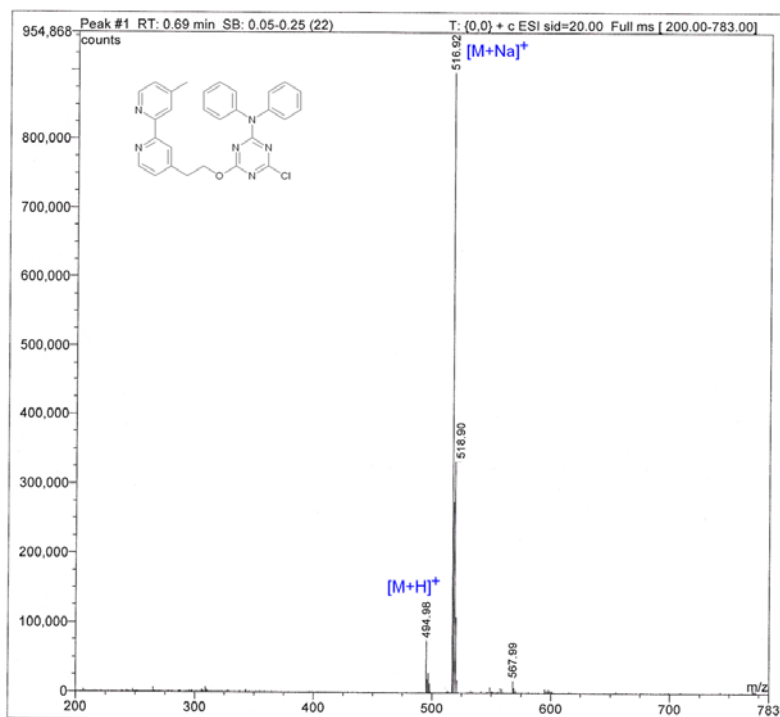

# <sup>1</sup>H, <sup>13</sup>C and mass spectra for 5b

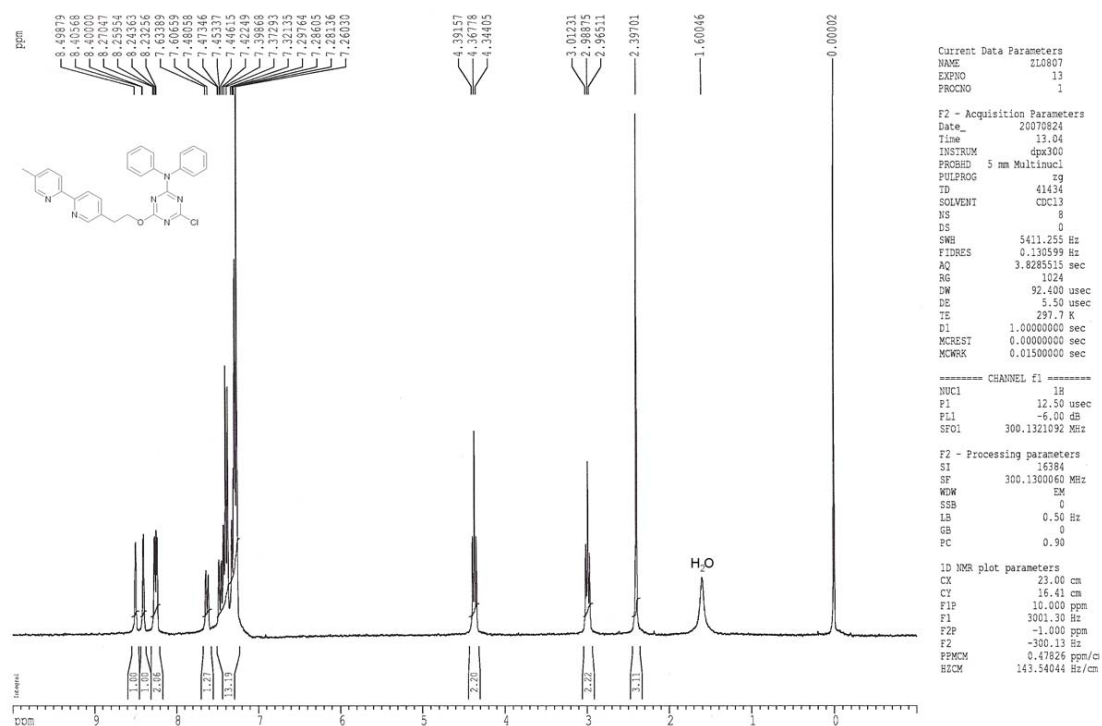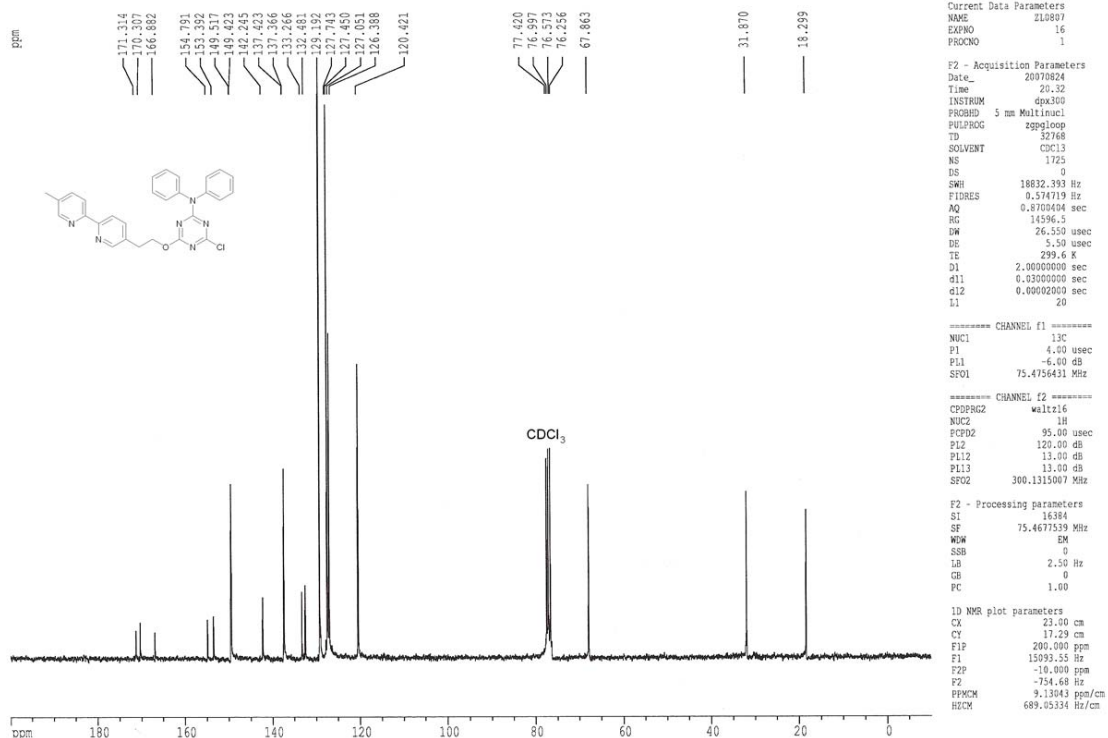

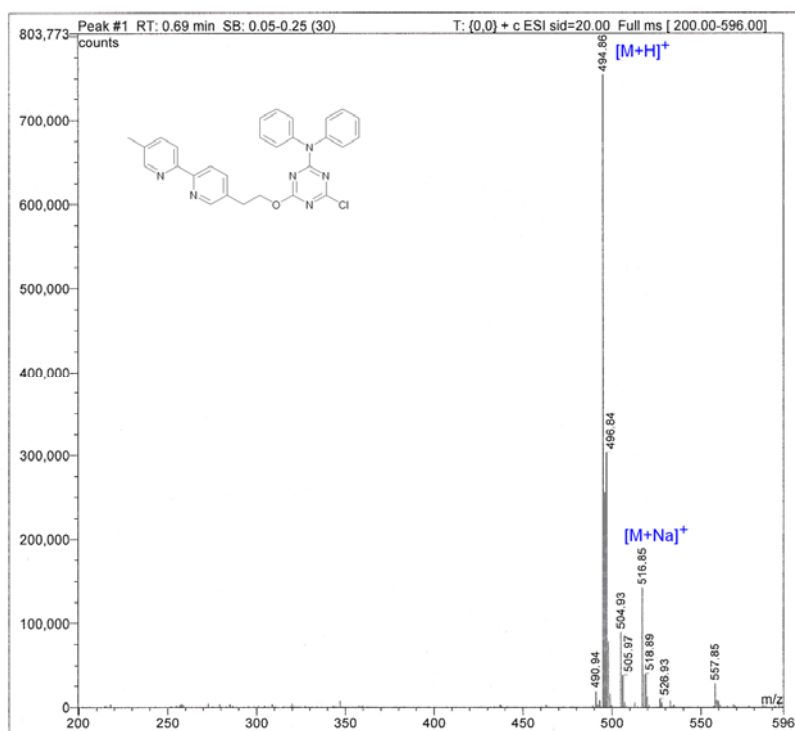

# <sup>1</sup>H, <sup>13</sup>C and mass spectra for 5c

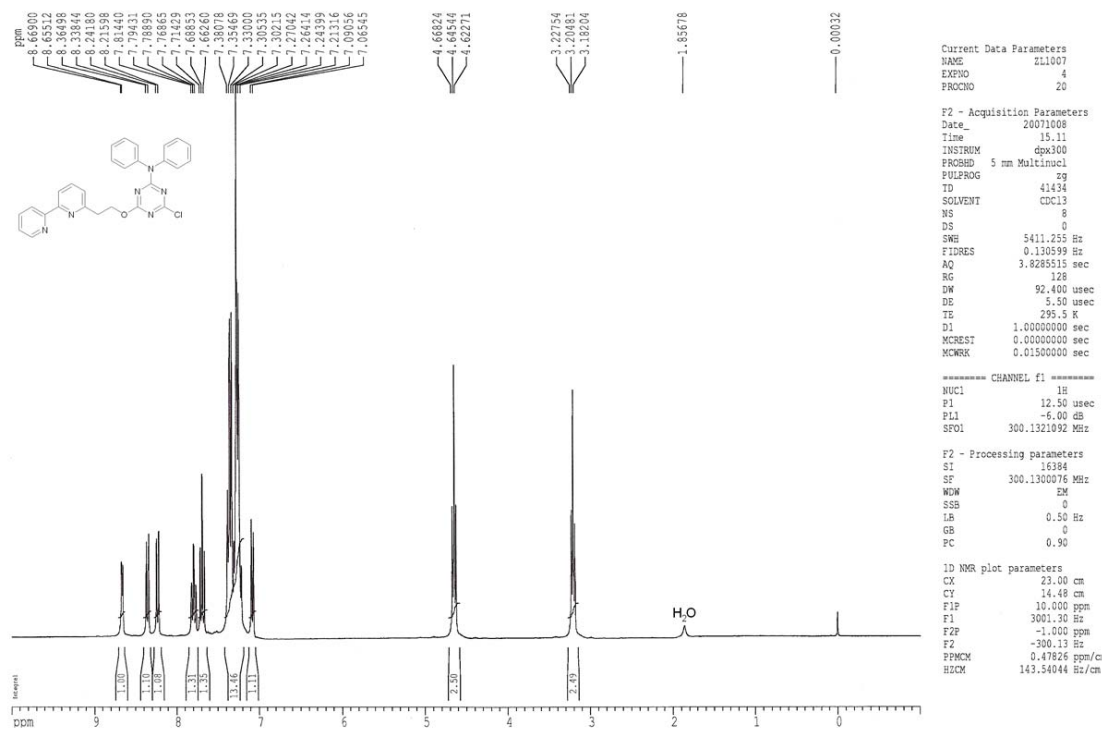



**Table S2.** Crystal data and structure and refinement data for **5a** and **5b**.

| Compound                                                | <b>5a</b>                                                           | <b>5b</b>                                          |
|---------------------------------------------------------|---------------------------------------------------------------------|----------------------------------------------------|
| formula                                                 | C <sub>28</sub> H <sub>23</sub> ClN <sub>6</sub> O                  | C <sub>28</sub> H <sub>23</sub> ClN <sub>6</sub> O |
| Fw (g mol <sup>-1</sup> )                               | 494.97                                                              | 494.97                                             |
| cryst size (mm <sup>3</sup> )                           | 0.13 × 0.10 × 0.09                                                  | 0.18 × 0.15 × 0.10                                 |
| cryst color                                             | colorless                                                           | colorless                                          |
| Temperature (K)                                         | 293(2)                                                              | 293(2)                                             |
| cryst syst, space group                                 | Orthorhombic, <i>P</i> 2 <sub>1</sub> 2 <sub>1</sub> 2 <sub>1</sub> | triclinic, <i>P</i> -1                             |
| <i>a</i> (Å)                                            | 8.335(1)                                                            | 9.807(1)                                           |
| <i>b</i> (Å)                                            | 9.607(1)                                                            | 10.877(1)                                          |
| <i>c</i> (Å)                                            | 31.311(3)                                                           | 12.740(1)                                          |
| <i>α</i> (deg)                                          | -                                                                   | 75.296(2)                                          |
| <i>β</i> (deg)                                          | -                                                                   | 78.660(2)                                          |
| <i>γ</i> (deg)                                          | -                                                                   | 70.606(2)                                          |
| volume (Å <sup>3</sup> )                                | 2507.0(4)                                                           | 1230.5(2)                                          |
| <i>Z</i>                                                | 4                                                                   | 2                                                  |
| calcd density (g cm <sup>-3</sup> )                     | 1.311                                                               | 1.336                                              |
| F(000)                                                  | 1032                                                                | 516                                                |
| abs coeff (mm <sup>-1</sup> )                           | 0.186                                                               | 0.189                                              |
| <i>θ</i> for data collection (deg)                      | 1.30–29.52                                                          | 1.67–29.04                                         |
| rflns collected ( <i>R</i> <sub>int</sub> )             | 31276 (0.0469)                                                      | 15197 (0.276)                                      |
| Data / params                                           | 6449 / 329                                                          | 6001 / 407                                         |
| goodness of fit on F <sup>2</sup>                       | 1.007                                                               | 1.010                                              |
| R1 (wR2) [ <i>I</i> > 2σ( <i>I</i> )]                   | 0.0518 (0.1139)                                                     | 0.0469 (0.1291)                                    |
| R1 (wR2) (all data)                                     | 0.0984 (0.1260)                                                     | 0.0743 (0.1460)                                    |
| largest diff. peak and hole ( <i>e</i> Å <sup>3</sup> ) | 0.279 and –0.171                                                    | 0.261 and –0.352                                   |

**Figure S1.** ORTEP view (thermal ellipsoids drawn at the 30% probability level) of compound **5a**.

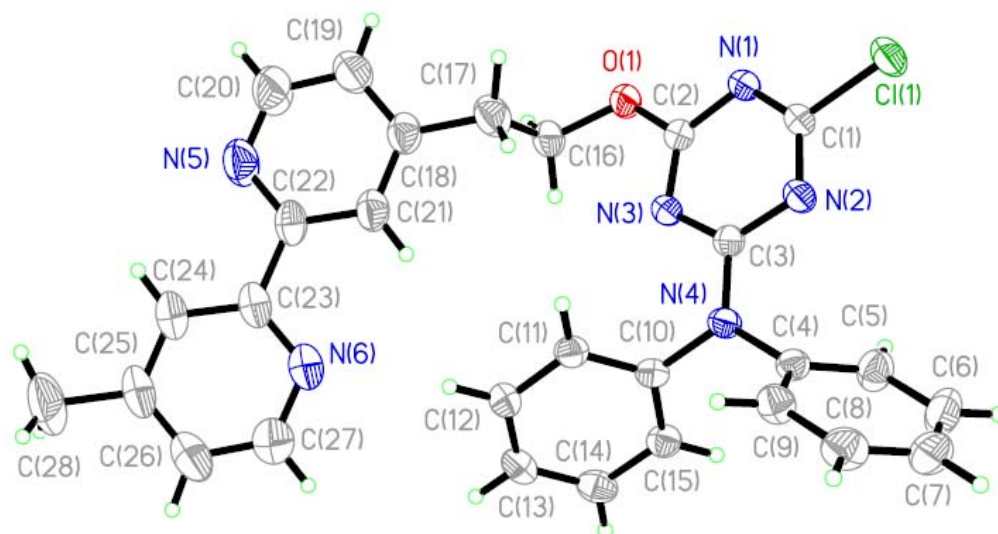

**Figure S2.** ORTEP view (thermal ellipsoids drawn at the 30% probability level) of compound **5b**.

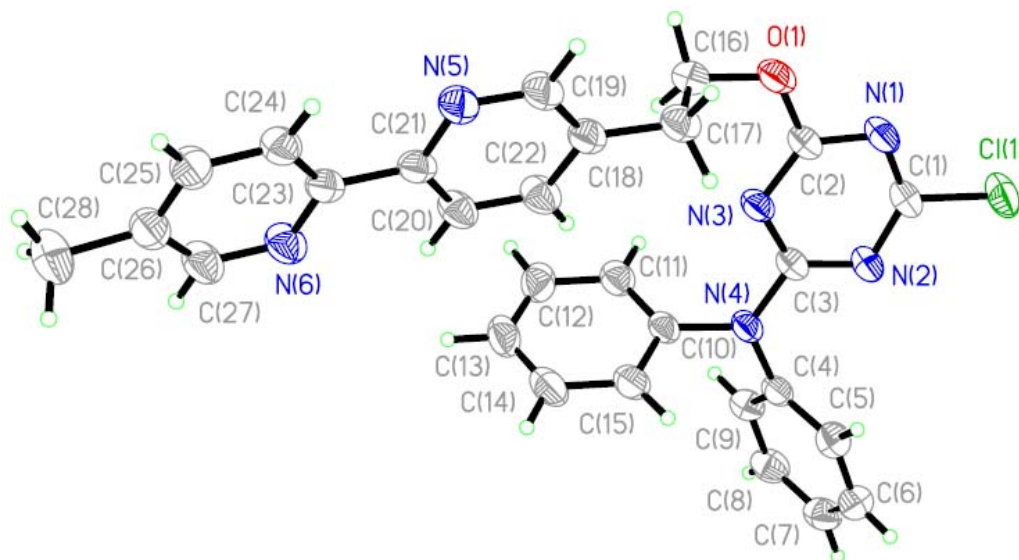

## Mass spectra for 4-bpyT, 5-bpyT and 6-bpyT

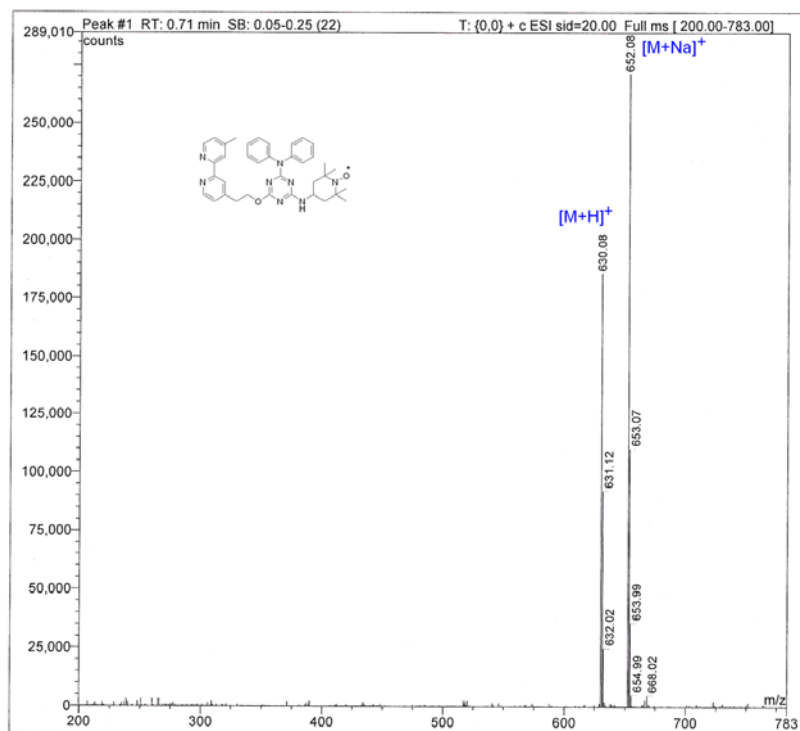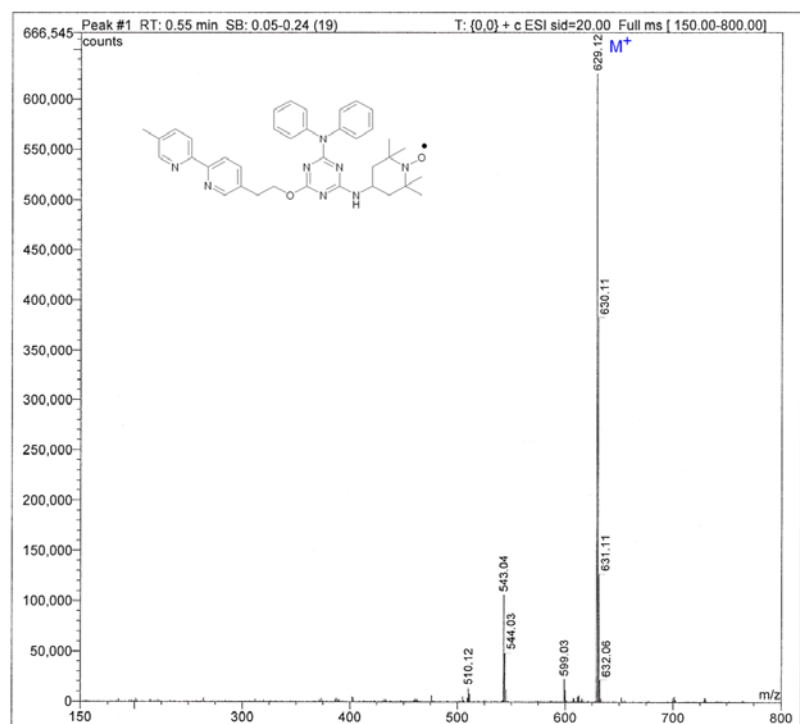

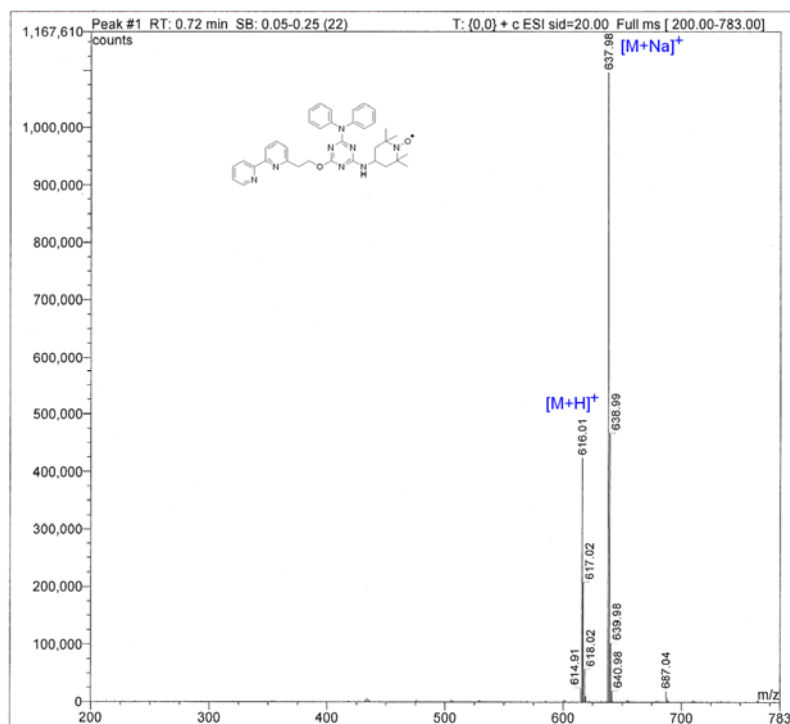

**Table S3.** Crystal data and structure and refinement data for **4-bpyT** and **6-bpyT**

| Compound                                                | <b>4-bpyT</b>                                                 | <b>6-bpyT</b>                                                       |
|---------------------------------------------------------|---------------------------------------------------------------|---------------------------------------------------------------------|
| formula                                                 | C <sub>37</sub> H <sub>41</sub> N <sub>8</sub> O <sub>2</sub> | C <sub>36</sub> H <sub>39.25</sub> N <sub>8</sub> O <sub>2.13</sub> |
| Fw (g mol <sup>-1</sup> )                               | 629.78                                                        | 618.00                                                              |
| cryst size (mm <sup>3</sup> )                           | 0.15 × 0.13 × 0.08                                            | 0.35 × 0.30 × 0.20                                                  |
| cryst color                                             | pink                                                          | orange                                                              |
| Temperature (K)                                         | 293(2)                                                        | 150(2)                                                              |
| cryst syst, space group                                 | Triclinic, <i>P</i> -1                                        | Triclinic, <i>P</i> -1                                              |
| <i>a</i> (Å)                                            | 10.880(2)                                                     | 12.079(1)                                                           |
| <i>b</i> (Å)                                            | 11.557(2)                                                     | 17.585(2)                                                           |
| <i>c</i> (Å)                                            | 15.819(2)                                                     | 17.697(2)                                                           |
| <i>α</i> (deg)                                          | 97.708(2)                                                     | 63.904(2)                                                           |
| <i>β</i> (deg)                                          | 108.723(2)                                                    | 78.702(2)                                                           |
| <i>γ</i> (deg)                                          | 110.203(2)                                                    | 89.122(2)                                                           |
| volume (Å <sup>3</sup> )                                | 1699.5(4)                                                     | 3299.6(6)                                                           |
| <i>Z</i>                                                | 2                                                             | 4                                                                   |
| calcd density (g cm <sup>-3</sup> )                     | 1.231                                                         | 1.244                                                               |
| F(000)                                                  | 670                                                           | 1313                                                                |
| abs coeff (mm <sup>-1</sup> )                           | 0.079                                                         | 0.096                                                               |
| <i>θ</i> for data collection (deg)                      | 1.95–29.64                                                    | 2.55–33.60                                                          |
| rflns collected ( <i>R</i> <sub>int</sub> )             | 21470 (0.0452)                                                | 47124 (0.0622)                                                      |
| Data / params                                           | 8568 / 534                                                    | 19590 / 910                                                         |
| goodness of fit on F <sup>2</sup>                       | 1.030                                                         | 1.068                                                               |
| R1 (wR2) [ <i>I</i> > 2σ( <i>I</i> )]                   | 0.0540 (0.0972)                                               | 0.0693(0.2029)                                                      |
| R1 (wR2) (all data)                                     | 0.1569 (0.1201)                                               | 0.0838(0.2203)                                                      |
| largest diff. peak and hole ( <i>e</i> Å <sup>3</sup> ) | 0.150 and –0.242                                              | 0.630 and –0.445                                                    |

**Figure S3.** ORTEP view (thermal ellipsoids drawn at the 30% probability level) of compound **4-bpyT**. Hydrogen atoms are omitted for clarity.

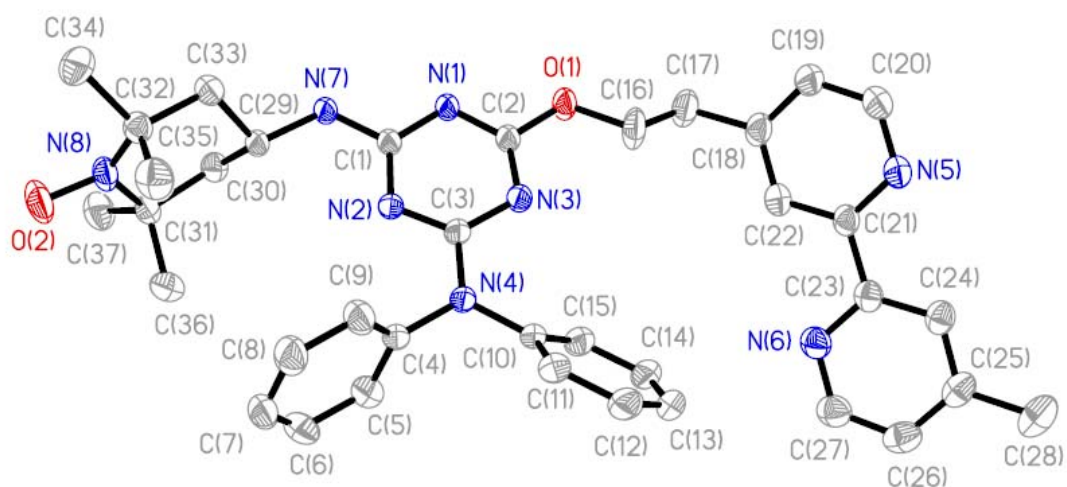

**Figure S4.** ORTEP view (thermal ellipsoids drawn at the 30% probability level) of compound **6-bpyT**. Hydrogen atoms and water molecule are omitted for clarity.

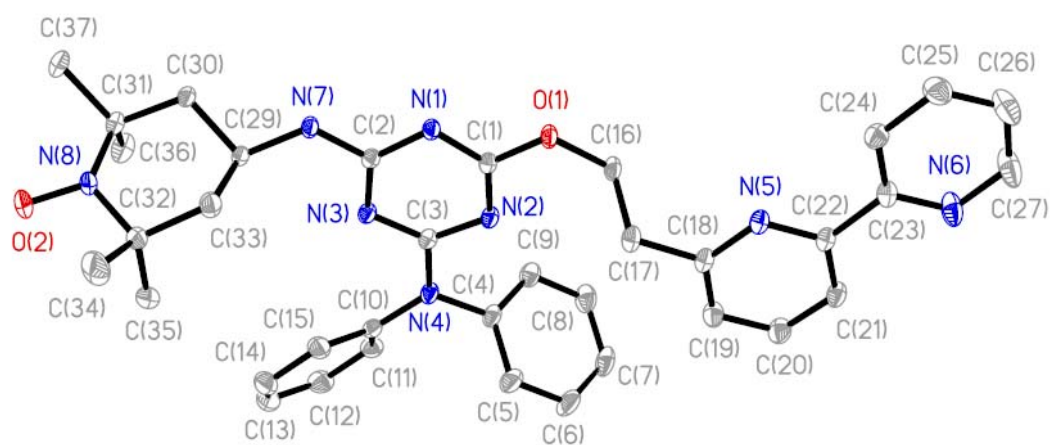

**Figure S5.** Mass spectrum of compound **6** dissolved in acetonitrile.

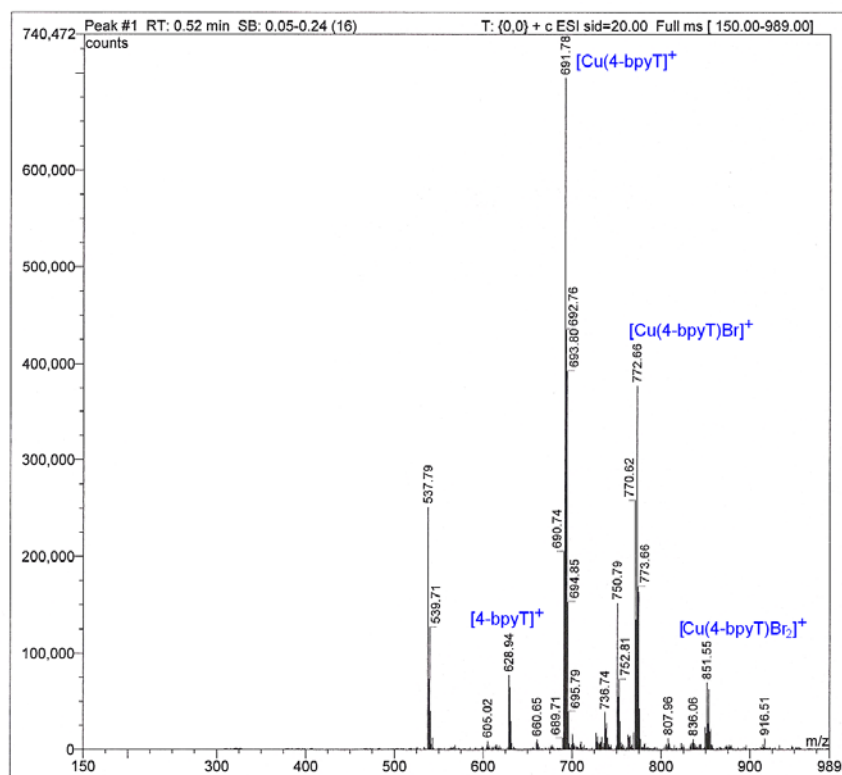

**Figure S6.** Mass spectrum of compound **7** dissolved in acetonitrile.

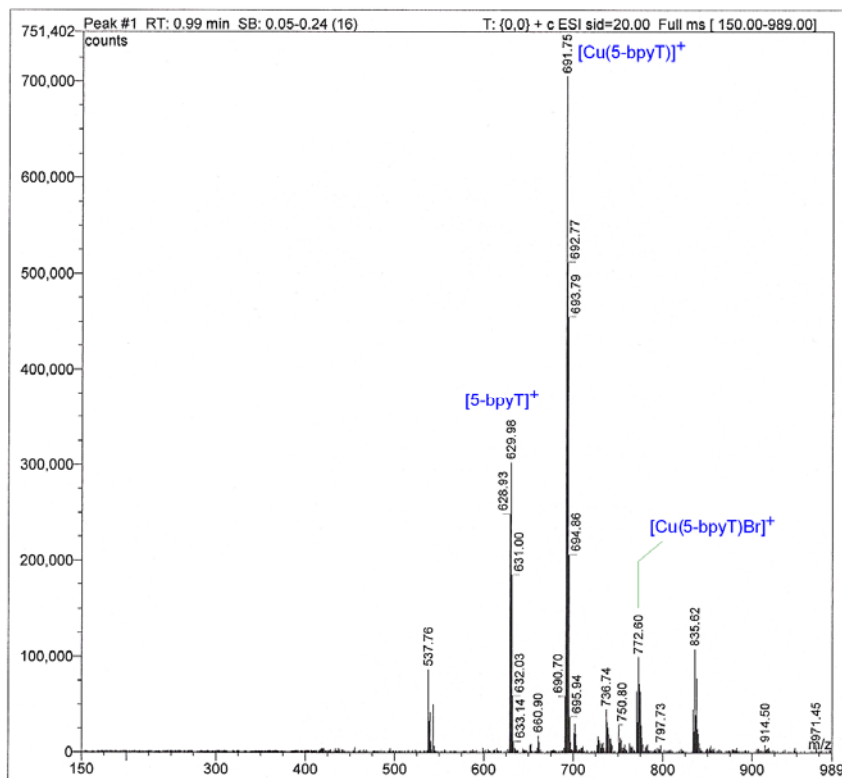

**Figure S7.** Mass spectrum of compound **8** dissolved in acetonitrile.

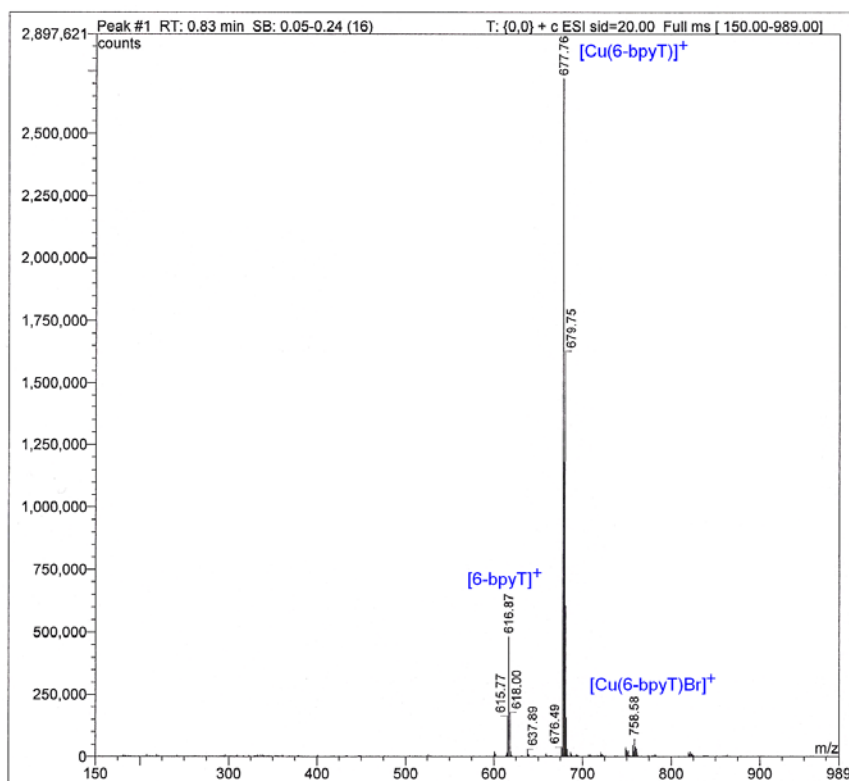

### Structural determination

The molecular structure of compounds **5a**, **5b**, **4-bpyT**, **6-bpyT**, **6**, **7** and **8** were determined by single-crystal X-ray diffraction methods. Crystallographic data and refinement details for **5a**, **5b**, **4-bpyT** and **6-bpyT** are given in Tables S2 and S3.

X-ray crystallographic data for **5a**, **5b** and **4-bpyT** were collected on a Bruker AXS Smart 1000 single-crystal diffractometer (MoK $\alpha$  radiation) equipped with a CCD area detector. The data reductions were performed using the SAINT and SADABS programs (SAINT, Software Users Guide, Version 6.0; Bruker Analytical X-ray Systems. In Software Users Guide, Version 6.0; Bruker Analytical X-ray Systems, Madison, WI, 1999. Sheldrick, G. M., SADABS v2.03: Area-Detector Absorption Correction. University of Göttingen, Germany, 1999.) The structures were solved by Direct Methods using the SIR97 program (Altomare, A.; Burla, M. C.; Camalli, M.; Cascarano, G. L.; Giacovazzo, C.; Guagliardi, A.; Moliterni, A. G. G.; Polidori, G.; Spagna, R. J. Appl. Cryst **1999**, 32, 115-119) and refined on  $F_o^2$  by full-matrix least-squares procedures, using the SHELXL-97 program (Sheldrick, G. M., SHELXL-97. Program for Crystal Structure Refinement. University of Göttingen, Germany, 1997).

All non-hydrogen atoms were refined with anisotropic atomic displacements. The hydrogen atoms were found in the difference Fourier map with the exception of the H atoms of compound **5a** and of the methyl groups in compounds **5b** and **4-bpyT**, which were included in the refinement at idealized geometries (C–H 0.95 Å) and refined “riding” on the corresponding parent atoms. The weighting scheme used in the last cycle of refinement was  $w = 1/[\sigma^2 F_o^2 + (0.0598P)^2]$ ,  $w = 1/[\sigma^2 F_o^2 + (0.0860P)^2]$  and  $w = 1/[\sigma^2 F_o^2 + (0.0409P)^2]$  (where  $P = (F_o^2 + 2F_c^2)/3$ ) for **5a**, **5b** and **4-bpyT** respectively.

X-ray crystallographic data for **6-bpyT**, **6**, **7** and **8** were collected on station 11.3.1 of the Advanced Light Source at Lawrence Berkeley National Laboratory, from synchrotron radiation at 0.7749 Å, from a silicon 111 monochromator, using either a Bruker Apex II CCD diffractometer (**6-bpyT**, **6** and **8**) or a Bruker Platinum 200 CCD diffractometer (**7**). The structures were solved with SIR97 (**6-bpyT**) (Altomare, A.; Burla, M. C.; Camalli, M.; Cascarano, G. L.; Giacovazzo, C.; Guagliardi, A.; Moliterni, A. G. G.; Polidori, G.; Spagna, R. J. Appl. Cryst **1999**, 32, 115-119) or SHELXS (**6**, **7** and **8**) (G. M. Sheldrick, (2001) *SHELXS*: Bruker AXS, Madison, Wisconsin, USA) and refined over  $F^2$  with SHELXTL (G. M. Sheldrick, (2001) *SHELXTL*: Bruker AXS, Madison, Wisconsin, USA). In the case of **6-bpyT**, a fraction of one molecule (from the triazine ring to the first pyridine ring) was disordered over two positions, disorder that was modeled with displacement parameters restraints, the minor part of the disorder being refined isotropically. The rest of the non-hydrogens were refined anisotropically. Hydrogens were placed geometrically and refined with a riding model except the N–H hydrogens that were found in the difference map and were allowed to refine freely. For compound **6**, all atoms were refined anisotropically except for one disordered acetonitrile molecule. Displacement parameter restraints were used in modelling the ligand, while the disordered acetonitrile was modelled using geometrical and displacement parameter restraints. Hydrogens were constrained geometrically and refined using a riding model, except the N–H hydrogen that was allowed to refine freely. For compound **7**, all non-hydrogens were refined anisotropically, while hydrogens were placed geometrically and refined with a riding model. No single-crystals of compound **8** could be found; therefore, for this compound the data were collected on a non-merohedral twin. The two orientation matrices were determined using CELL\_NOW

(G. M. Sheldrick, CELL\_NOW, v. 2007/3 Bruker AXS, Madison, Wisconsin, USA). TWINABS (G. M. Sheldrick, TWINABS v. 2007/3 Bruker AXS, Madison, Wisconsin, USA) produced the merged files for the structure solution and refinement. The reported  $R(\text{int})$  is that from merging in TWINABS 4.68% for all data 37239 observations. All non-hydrogens were refined anisotropically. Hydrogens were placed geometrically, constrained and refined using a riding model, except the N–H hydrogen that was found in the difference map and refined freely.

### **Visible spectroscopic studies on the Cu systems**

For these investigations, 0.01 mmol of the ligand was dissolved in 3 mL of acetonitrile. 0.01 mmol of  $\text{CuBr}_2$  was subsequently added and the visible spectrum of the resulting complex solution was recorded on a Varian Cary 50 UV/Vis spectrophotometer in the 400–1100 nm range. Next, 0.01 mmol of base was added to the previous mixture and the ensuing solution was measured.
